# Supplementary material
Source: publisher site journal article supplement (https://www.dovepress.com/article/458657)
Supplement: Supplementary file 1 [file get_supplementary_file.php]

**Appendix E**

**DEB-TACE:**

After digital subtraction angiography (DSA) was performed to determine the tumor blood vessels, a 2.7-F micro catheter (Cook, USA) was applied to inject 100 to 300um(or 300 to 500um) CalliSpheres drug elating hemispheres (,Jiangsu Hengrui Medicine, Jiangshu, China) loaded with 80 mg pirarubicin for tumor embolization, and the main blood supply artery was embolized with a mixture of gelatin sponge particles and contrast agent until the blood supply was completely blocked. We used the modified Response Evaluation Criteria in Solid Tumors (mRECIST) standard to evaluate the changes in the lesions. If there are no active lesions at 1 month after DEB-TACE, enhanced CT imaging will be reviewed and judged every 3 months. If there are active lesions, DEB-TACE treatment will be repeated.
